# Supplementary material
Source: PubMed Central journal article supplement (PMC2868396)
Supplement: supp_51_4_1823__3.pdf [file supp_51_4_1823__3.pdf]

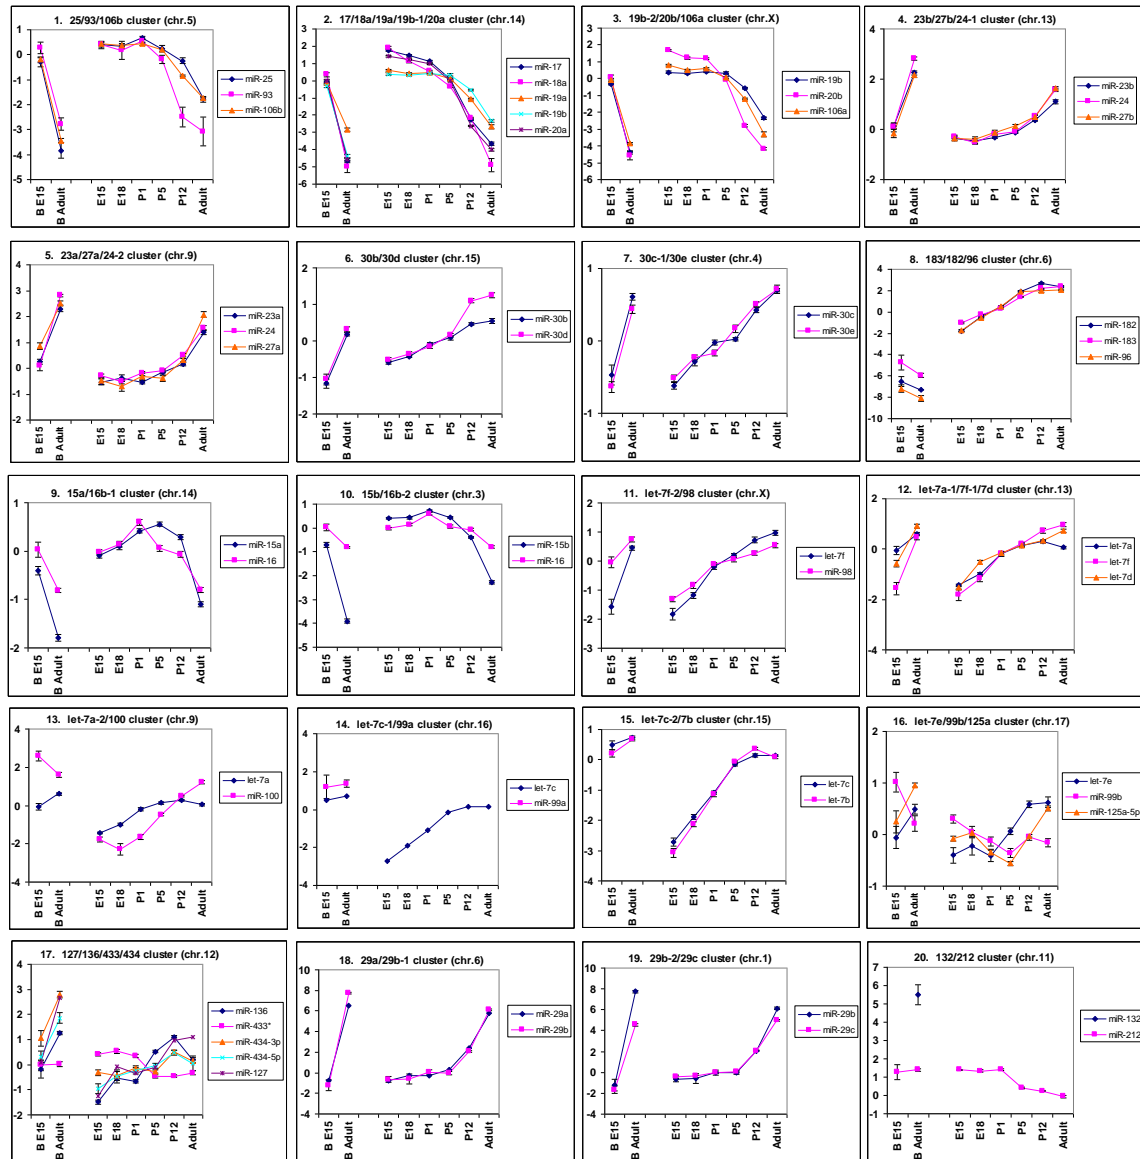

**Figure S2. Genomic clusters with at least two miRNAs expressed in retina and/or brain.** miRNAs with two copies in the genome were plotted twice referring to the two chromosomal locations. Y axis indicates relative expression on log<sub>2</sub> scale. Error bars indicate standard error.
