# Supplementary material
Source: PubMed Central journal article supplement (PMC2868396)
Supplement: supp_51_4_1823__4.pdf [file supp_51_4_1823__4.pdf]

## Supplementary Tables

**Table S1.** miRNA forward QPCR primers used for array validation.

| miR name              | Mature miRNA sequence    | Forward primer sequence | Confirm array?    |
|-----------------------|--------------------------|-------------------------|-------------------|
| <i>mmu-miR-106a</i>   | CAAAGUGCUAACAGUGCAGGUA   | CAAAGTGCTAACAGTGCAGGTA  | yes               |
| <i>mmu-miR-126-3p</i> | UCGUACCGUGAGUAAUAAUGC    | TCGTACCGTGAGTAATAATGC   | yes               |
| <i>mmu-miR-128</i>    | UCACAGUGAACCGGUCUCUUU    | TCACAGTGAACCGGTCTCTTT   | yes               |
| <i>mmu-miR-129-3p</i> | AAGCCCUUACCCCAAAAAGCAU   | AAGCCCTTACCCCAAAAAGCAT  | yes               |
| <i>mmu-miR-130b</i>   | CAGUGCAAUGAUGAAAGGGCAU   | CAGTGCAATGATGAAAGGGCAT  | yes               |
| <i>mmu-miR-143</i>    | UGAGAUGAAGCACUGUAGCUCA   | TGAGATGAAGCACTGTAGCTC   | yes               |
| <i>mmu-miR-15b</i>    | UAGCAGCACAUCAUGGUUUACA   | TAGCAGCACATCATGGTTTACA  | yes               |
| <i>mmu-miR-17</i>     | CAAAGUGCUIACAGUGCAGGUAG  | CAAAGTGCTTACAGTGCAGGTAG | yes               |
| <i>mmu-miR-181d</i>   | AACAUUCAUUGUUGUCGGUGGGUU | AACATTCATTGTTGTCGGTGGGT | yes               |
| <i>mmu-miR-182</i>    | UUUGGCAAUGGUAGAACUCACA   | TTTGGCAATGGTAGAACTCACA  | yes               |
| <i>mmu-miR-183</i>    | UAUGGCACUGGUAGAAUUCACUG  | TATGGCACTGGTAGAATTCAC   | yes               |
| <i>mmu-miR-184</i>    | UGGACGGAGAACUGAUAGGGU    | TGGACGGAGAACTGATAAGGGT  | yes               |
| <i>mmu-miR-18a</i>    | UAAGGUGCAUCUAGUGCAGAUAG  | TAAGGTGCATCTAGTGCAGATAG | yes               |
| <i>mmu-miR-19a</i>    | UGUGCAAUUCUUGCAAAAACUGA  | TGTGCAAATCTATGCAAAACTGA | yes               |
| <i>mmu-miR-204</i>    | UUCCCUUUGUCAUCCU AUGCCU  | TTCCCTTTGTCATCCTATGCCT  | yes               |
| <i>mmu-miR-20a</i>    | UAAAGUGCUIAUAGUGCAGGUAG  | TAAAGTGCTTATAGTGCAGGTAG | yes               |
| <i>mmu-miR-26b</i>    | UUCAAGUAAUUCAGGAUAGGUU   | TTCAAGTAATTCAGGATAGGTT  | yes               |
| <i>mmu-miR-298</i>    | GGCAGAGGAGGGCUGUUCUUC    | GGCAGAGGAGGGCTGTTCTT    | different profile |
| <i>mmu-miR-29a</i>    | UAGCACCAUCUGAAAUCGGUU    | TAGCACCATCTGAAATCGGTT   | yes               |
| <i>mmu-miR-30d</i>    | UGUAAACAUCCCGACUGGAAG    | TGTAACATCCCGACTGGAAG    | different profile |
| <i>mmu-miR-320</i>    | AAAAGCUGGGUUGAGAGGGCGAA  | AAAAGCTGGGTTGAGAGGGC    | yes               |
| <i>mmu-miR-335-5p</i> | UCAAGAGCAAUACGAAAAAUGU   | TCAAGAGCAATAACGAAAAATGT | yes               |
| <i>mmu-miR-691</i>    | AUUCUGAAGAGAGGCAGAAAA    | ATTCCTGAAGAGAGGCAGAAAA  | different profile |
