# Supplementary material
Source: PubMed Central journal article supplement (PMC2868396)
Supplement: supp_51_4_1823__5.pdf [file supp_51_4_1823__5.pdf]

## Supplementary tables

**Table S2.** QPCR primers used for host gene quantification.

| <b>Gene</b>   | <b>Forward</b>          | <b>Reverse</b>           |
|---------------|-------------------------|--------------------------|
| <i>Arpp21</i> | GAAAATGGCATCCTCAAGTCA   | TTCTCCTCTCTGGTTCTGAGC    |
| <i>R3hdm1</i> | AAGCTGCATCCACAGACCTT    | TGGTAGTTCTGTGATTTCCAAGAC |
| <i>Trpm1</i>  | GGTGCGGGATGTAAAGAAGA    | TGTAGTTGCAGCGGTAGGC      |
| <i>Trpm3</i>  | CCAAACTCAAGCAAGTCTTCG   | CCAACATGACGAATGACACC     |
| <i>Gapdh</i>  | TCAACAGCAACTCCCCTCTTCCA | ACCCTGTTGCTGTAGCCGTATTCA |
| <i>Actb</i>   | AAGGCCAACCGTGAAAAGAT    | GTGGTACGACCAGAGGCATAC    |
