# Supplementary material
Source: PubMed Central journal article supplement (PMC2868396)
Supplement: supp_51_4_1823__6.pdf [file supp_51_4_1823__6.pdf]

Supplementary tables

**Table S5.** Genomic clusters with at least two miRNAs expressed.

| Cluster # | Chromosome | miR name             | Detected |
|-----------|------------|----------------------|----------|
| 1         | 5          | <i>mmu-miR-106b</i>  | Yes      |
|           |            | <i>mmu-miR-93</i>    | Yes      |
|           |            | <i>mmu-miR-25</i>    | Yes      |
| 2         | 14         | <i>mmu-miR-17</i>    | Yes      |
|           |            | <i>mmu-miR-18a</i>   | Yes      |
|           |            | <i>mmu-miR-19a</i>   | Yes      |
|           |            | <i>mmu-miR-20a</i>   | Yes      |
|           |            | <i>mmu-miR-19b-1</i> | Yes      |
|           |            | <i>mmu-miR-92a-1</i> | No       |
| 3         | X          | <i>mmu-miR-106a</i>  | Yes      |
|           |            | <i>mmu-miR-18b</i>   | -        |
|           |            | <i>mmu-miR-20b</i>   | Yes      |
|           |            | <i>mmu-miR-19b-2</i> | Yes      |
|           |            | <i>mmu-miR-92a-2</i> | No       |
|           |            | <i>mmu-miR-363</i>   | No       |
| 4         | 13         | <i>mmu-miR-23b</i>   | Yes      |
|           |            | <i>mmu-miR-27b</i>   | Yes      |
|           |            | <i>mmu-miR-24-1</i>  | Yes      |
| 5         | 8          | <i>mmu-miR-23a</i>   | Yes      |
|           |            | <i>mmu-miR-27a</i>   | Yes      |
|           |            | <i>mmu-miR-24-2</i>  | Yes      |
| 6         | 15         | <i>mmu-miR-30d</i>   | Yes      |
|           |            | <i>mmu-miR-30b</i>   | Yes      |
| 7         | 4          | <i>mmu-miR-30e</i>   | Yes      |
|           |            | <i>mmu-miR-30c-1</i> | Yes      |
| 8         | 6          | <i>mmu-miR-183</i>   | Yes      |
|           |            | <i>mmu-miR-96</i>    | Yes      |
|           |            | <i>mmu-miR-182</i>   | Yes      |
| 9         | 14         | <i>mmu-miR-15a</i>   | Yes      |
|           |            | <i>mmu-miR-16-1</i>  | Yes      |
| 10        | 3          | <i>mmu-miR-15b</i>   | Yes      |
|           |            | <i>mmu-miR-16-2</i>  | Yes      |
| 11        | X          | <i>mmu-let-7f-2</i>  | Yes      |
|           |            | <i>mmu-miR-98</i>    | Yes      |
| 12        | 13         | <i>mmu-let-7a-1</i>  | Yes      |
|           |            | <i>mmu-let-7f-1</i>  | Yes      |
|           |            | <i>mmu-let-7d</i>    | Yes      |
| 13        | 9          | <i>mmu-miR-100</i>   | Yes      |
|           |            | <i>mmu-let-7a-2</i>  | Yes      |
| 14        | 16         | <i>mmu-miR-99a</i>   | Yes      |
|           |            | <i>mmu-let-7c-1</i>  | Yes      |
| 15        | 15         | <i>mmu-let-7c-2</i>  | Yes      |
|           |            | <i>mmu-let-7b</i>    | Yes      |
| 16        | 17         | <i>mmu-miR-99b</i>   | Yes      |
|           |            | <i>mmu-let-7e</i>    | Yes      |
|           |            | <i>mmu-miR-125a</i>  | Yes      |
| 17        | 12         | <i>mmu-miR-431</i>   | No       |
|           |            | <i>mmu-miR-433</i>   | Yes      |
|           |            | <i>mmu-miR-127</i>   | Yes      |
|           |            | <i>mmu-miR-434</i>   | Yes      |
|           |            | <i>mmu-miR-136</i>   | Yes      |
| 18        | 6          | <i>mmu-miR-29b-1</i> | Yes      |
|           |            | <i>mmu-miR-29a</i>   | Yes      |
| 19        | 1          | <i>mmu-miR-29b-2</i> | Yes      |
|           |            | <i>mmu-miR-29c</i>   | Yes      |
| 20        | 11         | <i>mmu-miR-212</i>   | Yes      |
|           |            | <i>mmu-miR-132</i>   | Yes      |
