# Supplementary material
Source: PubMed Central journal article supplement (PMC2868396)

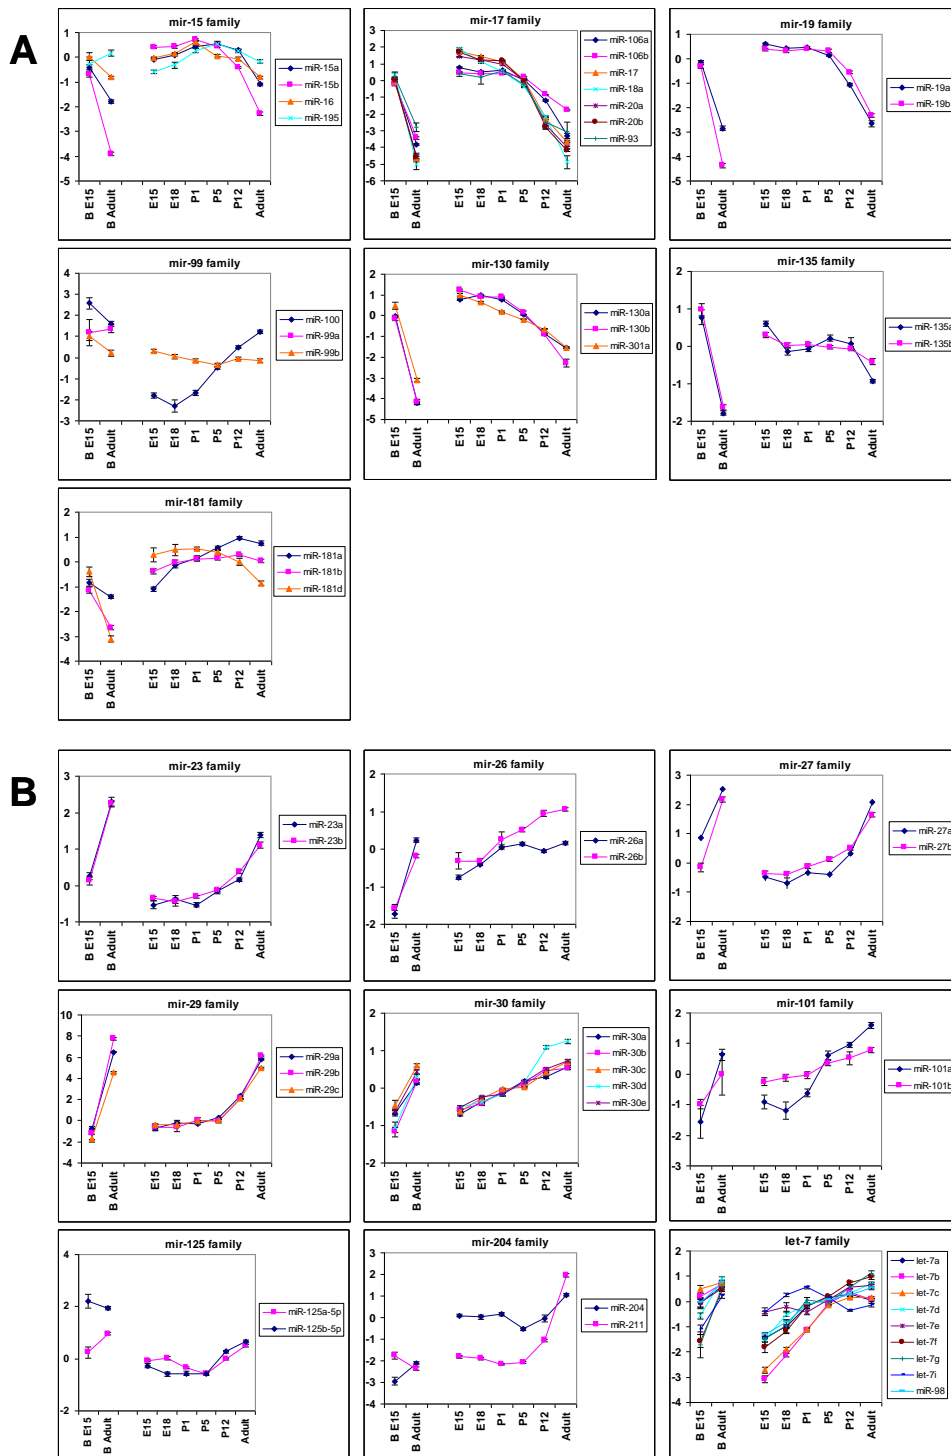

Supplement: supp_51_4_1823__2.pdf [file supp_51_4_1823__2.pdf]
